# Supplementary material for: CO2-to-CO conversion on layered perovskite with in situ exsolved Co–Fe alloy nanoparticles: an active and stable cathode for solid oxide electrolysis cells
Source: Royal Society of Chemistry journal article supplement (doi:10.1039/c6ta06365a), 2016-01-01
Supplement: c6ta06365a1.pdf [file c6ta06365a1.pdf]

## **Supplementary Information**

### **CO<sub>2</sub>-to-CO Conversion on Layered Perovskite with *in Situ* Exsolved Co-Fe Alloy Nanoparticles: An Active and Stable Cathode for Solid Oxide Electrolysis Cell**

Subiao Liu, Qingxia Liu, Jing-Li Luo\*

Department of Chemical and Materials Engineering, University of Alberta, Edmonton,  
Alberta T6G 1H9, Canada

Corresponding author: Jing-Li Luo

Telephone: +1 780 492 2232

\*Email: [luoj@ualberta.ca](mailto:luoj@ualberta.ca)

## **The specifications of chemicals and gases:**

$\text{Pr}(\text{NO}_3)_3 \cdot 5\text{H}_2\text{O}$  (Fisher Scientific Company, 99.995%);  $\text{Sr}(\text{NO}_3)_2$  (Fisher Scientific Company, Crystalline);  $\text{Fe}(\text{NO}_3)_3 \cdot 9\text{H}_2\text{O}$  (Fisher Scientific Company, Crystalline);  $\text{Co}(\text{NO}_3)_3 \cdot 6\text{H}_2\text{O}$  (ACROS ORGANICS, 99+%);  $(\text{NH}_4)_6\text{Mo}_7\text{O}_{24} \cdot 4\text{H}_2\text{O}$  (Fisher Scientific Company, 99.9%);  $\text{NH}_3\text{H}_2\text{O}$  (ACROS ORGANICS, 28-30%);

Citric acid (Fisher Scientific Company, 99.9%); Alpha-terpineol (ACROS ORGANICS, 99+%); Cellulose (ACROS ORGANICS, 99%); 2-isopropanol (Fisher Scientific Company, 70%); 1-butanol (Sigma Aldrich, 99.4+%); Benzyl butyl phthalate (BBP, ACROS ORGANICS, 97%); Ethylenediamine tetraacetic acid (EDTA, Fisher Scientific Company, 99.6%);

$\text{CO}_2/\text{CO}$  in the ratio of 70:30 (Prexair Company, Canada); 5%  $\text{H}_2/\text{N}_2$  (Prexair Company, Canada).

## **Materials preparation**

Polycrystalline perovskite powders of  $\text{Pr}_{0.4}\text{Sr}_{0.6}\text{Co}_{0.2}\text{Fe}_{0.7}\text{Mo}_{0.1}\text{O}_{3-\delta}$  (PSCFM) were prepared using a modified sol-gel method as described elsewhere.[1] Stoichiometric amounts of  $\text{Pr}(\text{NO}_3)_3 \cdot 5\text{H}_2\text{O}$ ,  $\text{Sr}(\text{NO}_3)_2$ ,  $\text{Co}(\text{NO}_3)_2 \cdot 6\text{H}_2\text{O}$ ,  $\text{Fe}(\text{NO}_3)_3 \cdot 9\text{H}_2\text{O}$  and  $(\text{NH}_4)_6\text{Mo}_7\text{O}_{24} \cdot 4\text{H}_2\text{O}$  were dissolved in EDTA- $\text{NH}_3\text{H}_2\text{O}$  combined solution under continuous heating and stirring, then citric acid was introduced. The molar ratio of EDTA acid : citric acid : total metal ions was controlled to be around 1 : 1.5 : 1. Subsequently,  $\text{NH}_3\text{H}_2\text{O}$  was added to adjust the pH value to 8~9. The solution was stirred and heated on a hot plate at 80 °C until the formation of organic resins containing the homogeneously distributed cations due to the slow evaporation of the solvent. The synthesized gel was decomposed at 300 °C for 4 h to remove the organic components

and the nitrates. The raw powders were then fired at 1100 °C for 10 h in air to obtain the raw materials, followed by heating in a tubular furnace at 850 °C for 10 h in a 5% H<sub>2</sub>/N<sub>2</sub> reducing gas flow, thus forming the Co-Fe *in-situ* exsolved (Pr<sub>0.4</sub>Sr<sub>0.6</sub>)<sub>3</sub>(Fe<sub>0.85</sub>Mo<sub>0.15</sub>)<sub>2</sub>O<sub>7</sub> (Co-Fe-PSFM). (La<sub>0.60</sub>Sr<sub>0.40</sub>)<sub>0.95</sub>Co<sub>0.20</sub>Fe<sub>0.80</sub>O<sub>3-δ</sub> (LSCF) and Gd<sub>0.2</sub>Ce<sub>0.8</sub>O<sub>2-δ</sub> (GDC) powders were fabricated using a conventional solid state reaction method.[2] The cathode pastes were prepared by mixing Co-Fe-PSFM and GDC (weight ratio 1:1) with a glue containing 1-butanol, benzyl butyl phthalate (BBP), ethyl cellulose and α-terpineol, followed by ball milling for 3 h. The weight ratio of total powders to glue was 1.7:1. The anode pastes comprised of LSCF and GDC were prepared using the same method as the cathode pastes.

### **Materials Characterization**

Thermogravimetric analyses (TA SDT Q600) were performed from 20 °C to 900 °C at a heating/cooling rate of 10 °C min<sup>-1</sup> in air or 5% H<sub>2</sub>/N<sub>2</sub> to characterize the thermophysical properties. The crystalline structure of all the synthesized powders was identified by X-ray diffraction (XRD) with Rigaku Rotaflex Cu Kα radiation (40kV, 44mA) and the raw data were analyzed with the software of JADE 6.5. Microstructures were determined with a high-resolution Zeiss Sigma FE-SEM equipped with an EDX detector and an EBSD detector. The PSCFM and Co-Fe-PSFM powders were also analyzed using a JEOL JEM 2100 TEM at an accelerating voltage of 200 kV. X-ray photoelectron spectroscopy (XPS, Kratos AXIS Ultra) was used to investigate the surface chemistry of the PSCFM and Co-Fe-PSFM powders with the adventitious carbon (C 1s) at the binding energy (BE) of 284.6 eV as the reference.

## Cell fabrication

The cells investigated in this work were YSZ electrolyte supported (polished before fabrication); the dimensions of the commercial YSZ discs (“fuelcellmaterials.com”) are 250~300  $\mu\text{m}$  in thickness and 25 mm in diameter. The GDC pastes were screen-printed on both anode and cathode sides of the YSZ electrolyte disc and co-sintered at 1300  $^{\circ}\text{C}$  for 5 h to form dense GDC buffer layers with a thickness of  $\sim 20$   $\mu\text{m}$ . Both the cathode pastes and anode pastes were screen-printed onto the corresponding surfaces of the YSZ disc to form a membrane electrode assembly (MEA) with a circular area of 1.6024  $\text{cm}^2$ . The MEA was sintered at 1100  $^{\circ}\text{C}$  for 4 h in air. Gold paste was painted onto the surfaces of both anode and cathode to form current collectors. The  $\text{CO}_2$  electrolysis cell was built by fixing the MEA between coaxial pairs of alumina tubes with a sealant, which was fastened in a vertical tubular furnace (Thermolyne F79300). Dry  $\text{CO}_2/\text{CO}$  (70:30) was fed to the cell with a flow rate of 50  $\text{ml min}^{-1}$  via the cathode compartment located at the bottom, while the anode was placed on the top and exposed to air.

## Cell testing

The electrochemical performance of the  $\text{CO}_2$  electrolysis cell was measured by employing a four-probe method with Au wires as the leads. The temperature of the  $\text{CO}_2$  electrolysis cell was slowly increased to 850  $^{\circ}\text{C}$  and a 5%  $\text{H}_2/\text{N}_2$  reducing gas flow was continuously pumped into the cathode compartment. The temperature was maintained for 2 h to complete the further reduction and exsolution of the cathode material. The electrochemical measurements were conducted with a Solartron 1255 frequency response analyzer and a Solartron 1286 electrochemical interface instrument. The polarization resistance of the  $\text{CO}_2$  electrolysis cell was determined from electrochemical impedance spectroscopy (EIS) measured under an AC potential with a

frequency range of 1 MHz to 0.1 Hz and an amplitude of 10 mV at the stable open circuit voltage (OCV). Stability test in dry CO<sub>2</sub>/CO (70:30) was performed under a constant applied potential of 0.6 V (vs. OCV) at 850 °C. The outlet gases from the cathode compartment were analyzed using a Hewlett-Packard model HP5890 GC equipped with a packed column (Porapak QS) operated at 80 °C with a thermal conductivity detector and a flame ionization detector. Nicolet Almega XR Dispersive Raman Microscope with 532 nm laser and X50 objective was used to determine the level of coke deposition on the Co-Fe-PSFM cathode after CO<sub>2</sub> electrolysis.

### Faraday efficiency calculation

$$FE_j = \frac{2FVvp_0}{RT_0I_{total}} \times 100\%$$

$$FE_{CO} = \frac{2 \times 96,485 \left( \frac{C}{mol} \right) \times V \left( \frac{m^3}{s} \right) \times v(vol\%) \times 1.01 \times 10^5 \left( \frac{N}{m^2} \right)}{8.314 \left( \frac{N m}{mol K} \right) \times 298.15(K) \times I_{total} \left( \frac{C}{s} \right)} \times 100\%$$

$$FE_{CO}$$

$$= \frac{2 \times 96,485 \left( \frac{C}{mol} \right) \times V \left( \frac{mL}{min} \right) \times 10^{-6} \left( \frac{m^3}{mL} \right) \times v(vol\%) \times 1.01 \times 10^5 \left( \frac{N}{m^2} \right)}{8.314 \left( \frac{N m}{mol K} \right) \times 298.15(K) \times I_{total} \left( \frac{C}{s} \right) \times 60 \left( \frac{s}{min} \right)} \times 100\%$$

where the unit of V is mL/min. then

$$FE_{CO} = \frac{0.1315 \times V \left( \frac{mL}{min} \right) \times v(vol\%)}{I_{total}(A)} \times 100\%$$

$v$  (Vol%) = volume concentration of CO in the exhaust gas from the electrochemical cell (GC data).

$V$  (mL/min) = Gas flow rate measured by a flow meter at the exit of the electrochemical cell at room temperature and ambient pressure.

$I_{total}(A)$  = steady-state cell current.

### **Schematics of IT-SOEC setup for CO<sub>2</sub> electrolysis**

Two coaxial alumina tubes (containing an inlet and an outlet) are used as electrode compartments to place the cell, and there is a small gap between the inlet tube and the cathode. The ceramic sealant (552) is applied to seal the outer edge of the cathode side to prevent the leakage of CO<sub>2</sub>/CO. The gold wires welded to a gold mesh that contacts the electrode, go through the inlet and are connected to the testing instrument (Solartron). The CO<sub>2</sub>/CO gas is fed to cathode compartment at a flow rate (30 ml min<sup>-1</sup>) and the anode compartment is open to air directly.

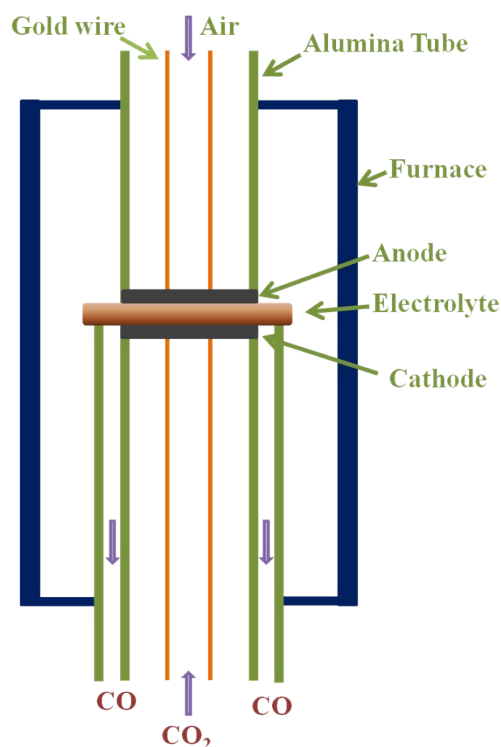

### Figure captions

**Fig. S1.** The morphology of the Co-Fe-PSFM powder and the corresponding EDS elemental mappings (Sr, Co, Fe).

**Fig. S2.** (A) Representative XPS of PSCFM powders, (B) Co 2p spectra and (C) Fe 2p spectra.

**Fig. S3.** XRD pattern for the powders after re-oxidation.

**Fig. S4.** Electrochemical performances of cell 1 with PSCFM cathode material. (A) CO<sub>2</sub>/CO compositions in the outlet gases at different applied potentials and 800 °C. (B) the corresponding production rates and Faraday efficiencies of CO<sub>2</sub> electrolysis at different applied potentials and 850 °C. A GC run repeated every 10 min. The average value of two measurements was taken as the gas volumetric concentration for Faraday

efficiency calculation. The flow rate of CO<sub>2</sub> in the anode compartment was 30 ml min<sup>-1</sup> (the flow rate measured by a flow meter at the exit of the cell was around 26 ml min<sup>-1</sup>) and the anode was exposed to air.

**Fig. S5.** (A) XRD pattern for the cathode surface of cell 2 with PSCFM after the stability test. (B) EDS elemental mapping of cathode side cross section of cell 2 with Co-Fe-PSFM.

**Figure S1**

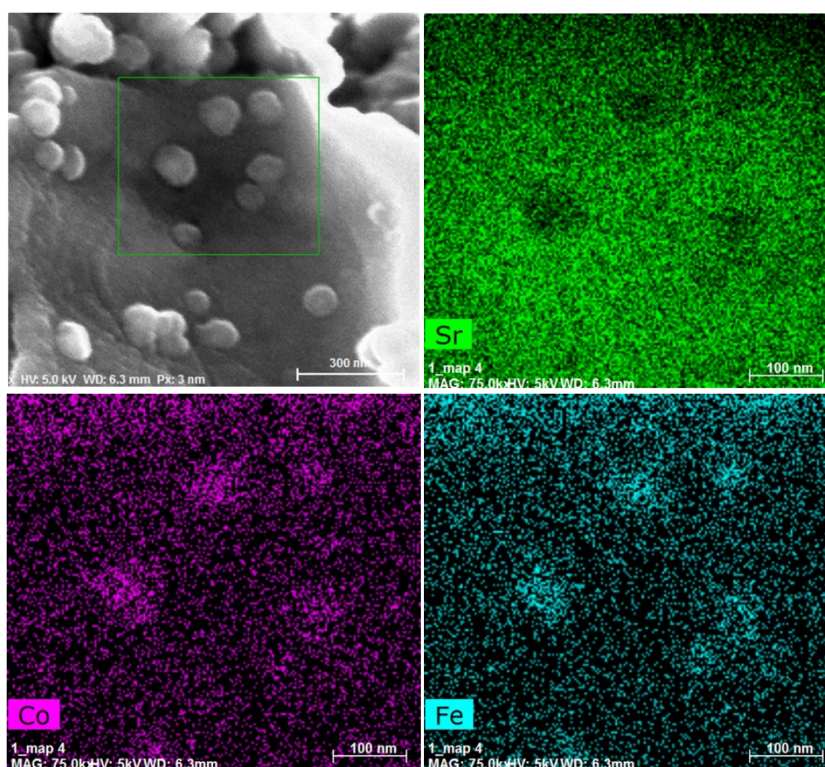



Fig. S1. The morphology of the Co-Fe-PSFM powder and the corresponding EDS elemental mappings (Sr, Co, Fe).

**Figure S2**

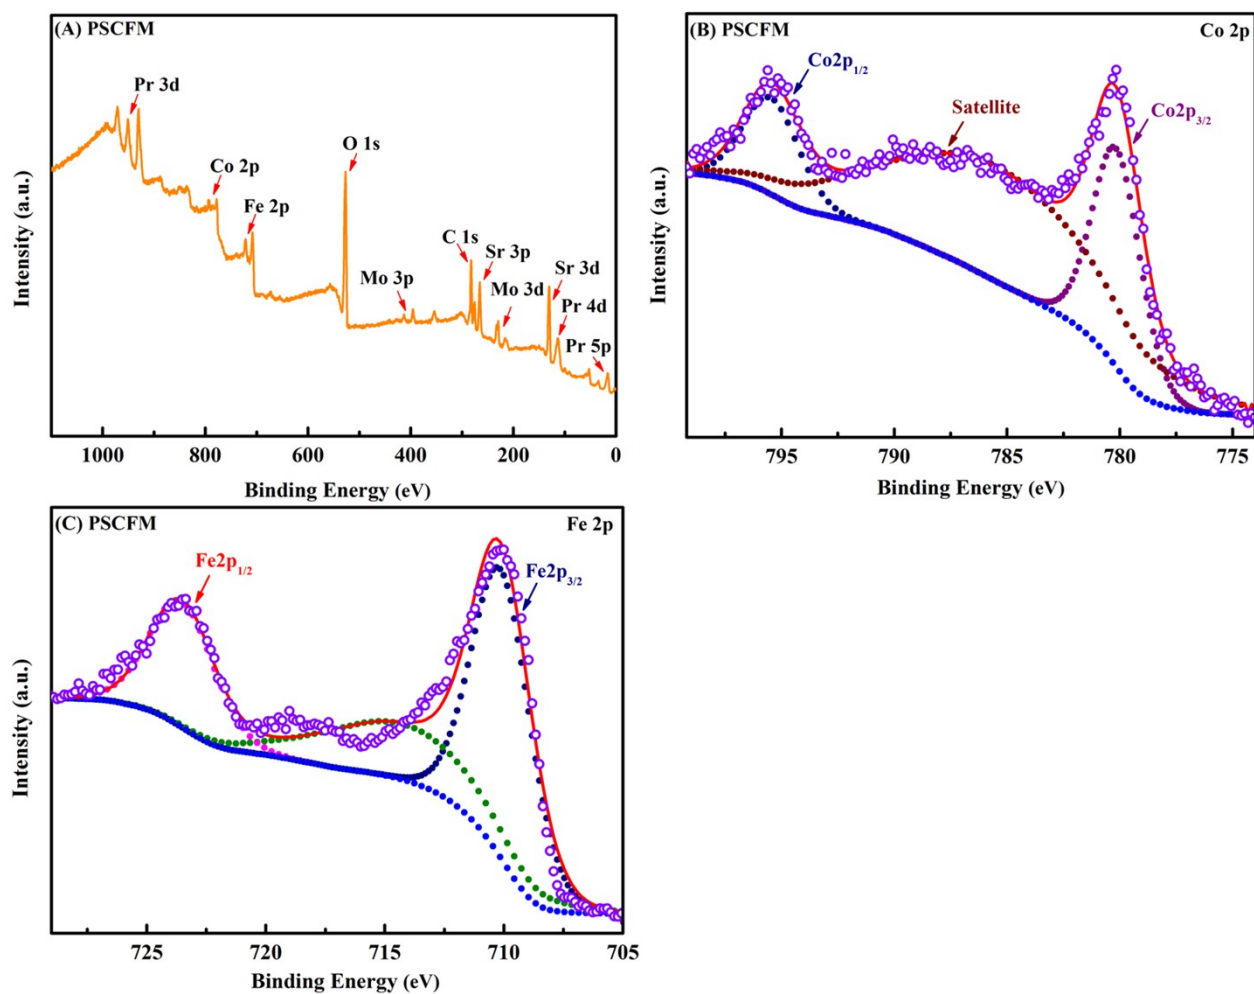

Fig. S2. (A) Representative XPS of PSCFM powders, (B) Co 2p spectra and (C) Fe 2p spectra.

Figure S3

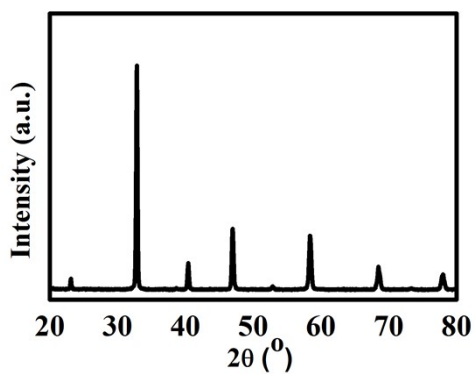

Fig. S3. XRD pattern for the powders after re-oxidation.

Figure S4

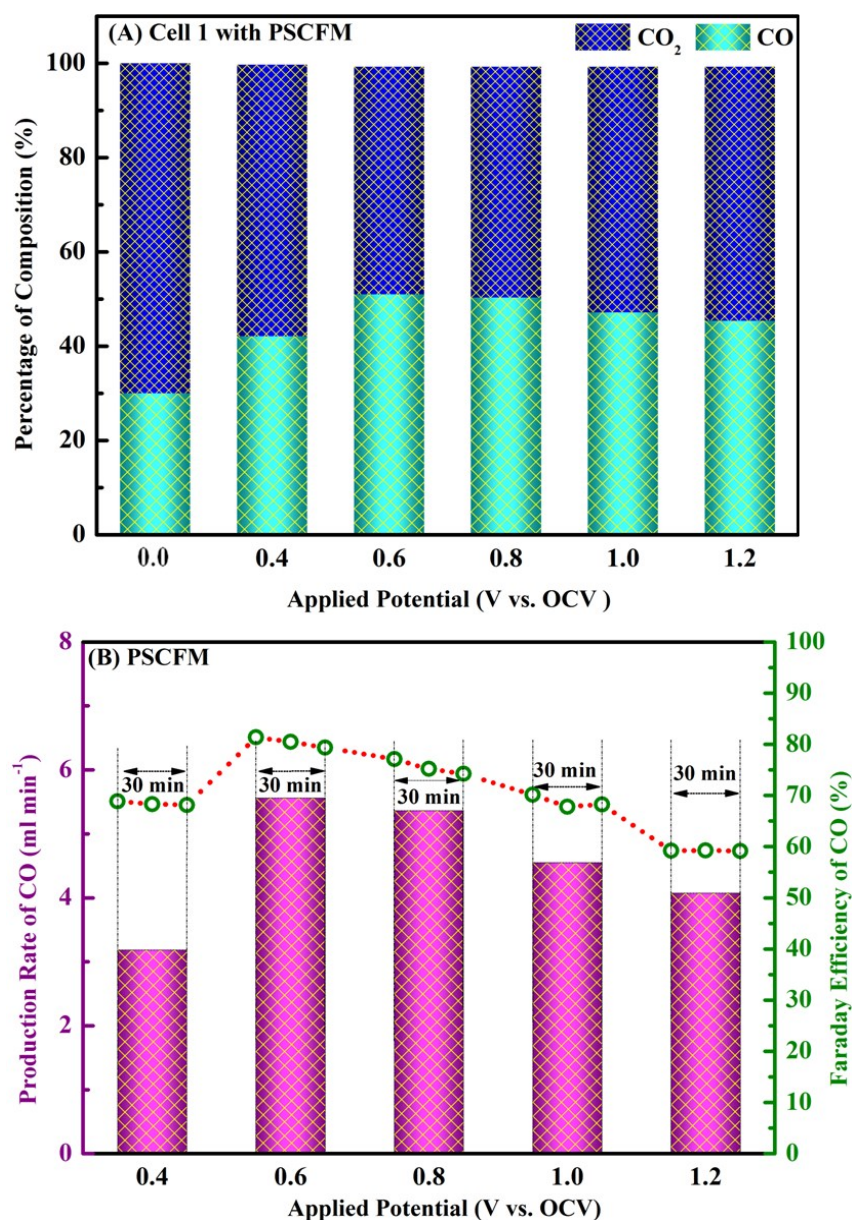

Fig. S4. Electrochemical performances of cell 1 with PSCFM cathode material. (A) CO<sub>2</sub>/CO compositions in the outlet gases at different applied potentials and 800 °C. (B) the corresponding production rates and Faraday efficiencies of CO<sub>2</sub> electrolysis at different applied potentials and 850 °C. A GC run repeated every 10 min. The average value of two measurements was taken as the gas volumetric concentration for Faraday efficiency calculation. The flow rate of CO<sub>2</sub> in the anode compartment was 30 ml min<sup>-1</sup> (the flow rate measured by a flow meter at the exit of the cell was around 26 ml min<sup>-1</sup>) and the anode was exposed to air.

Figure S5

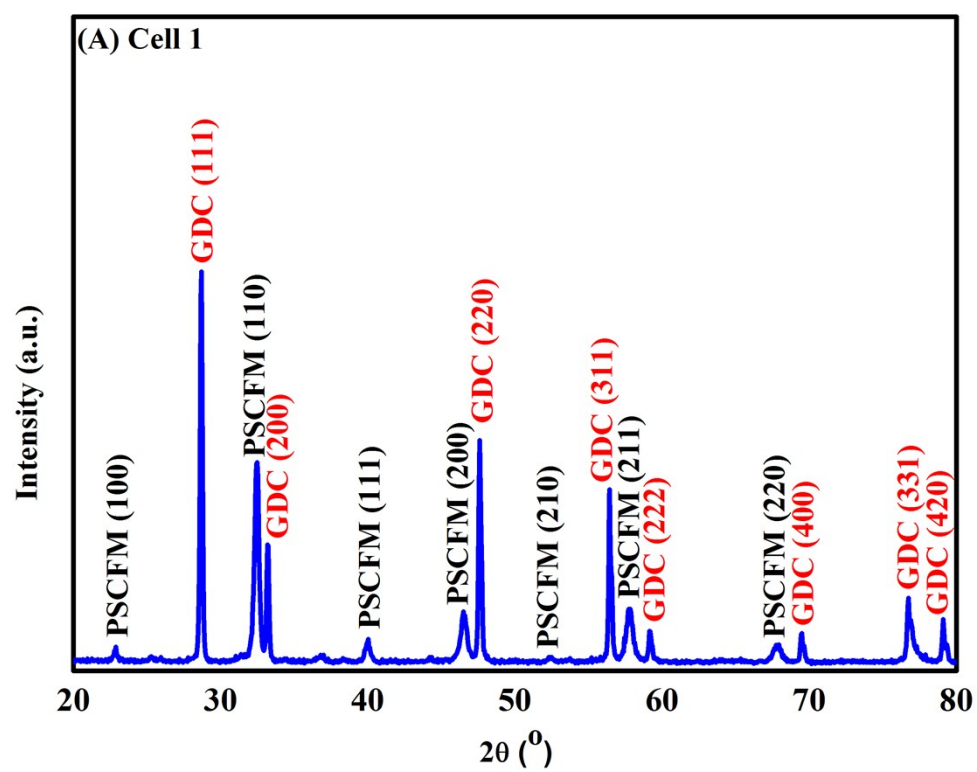



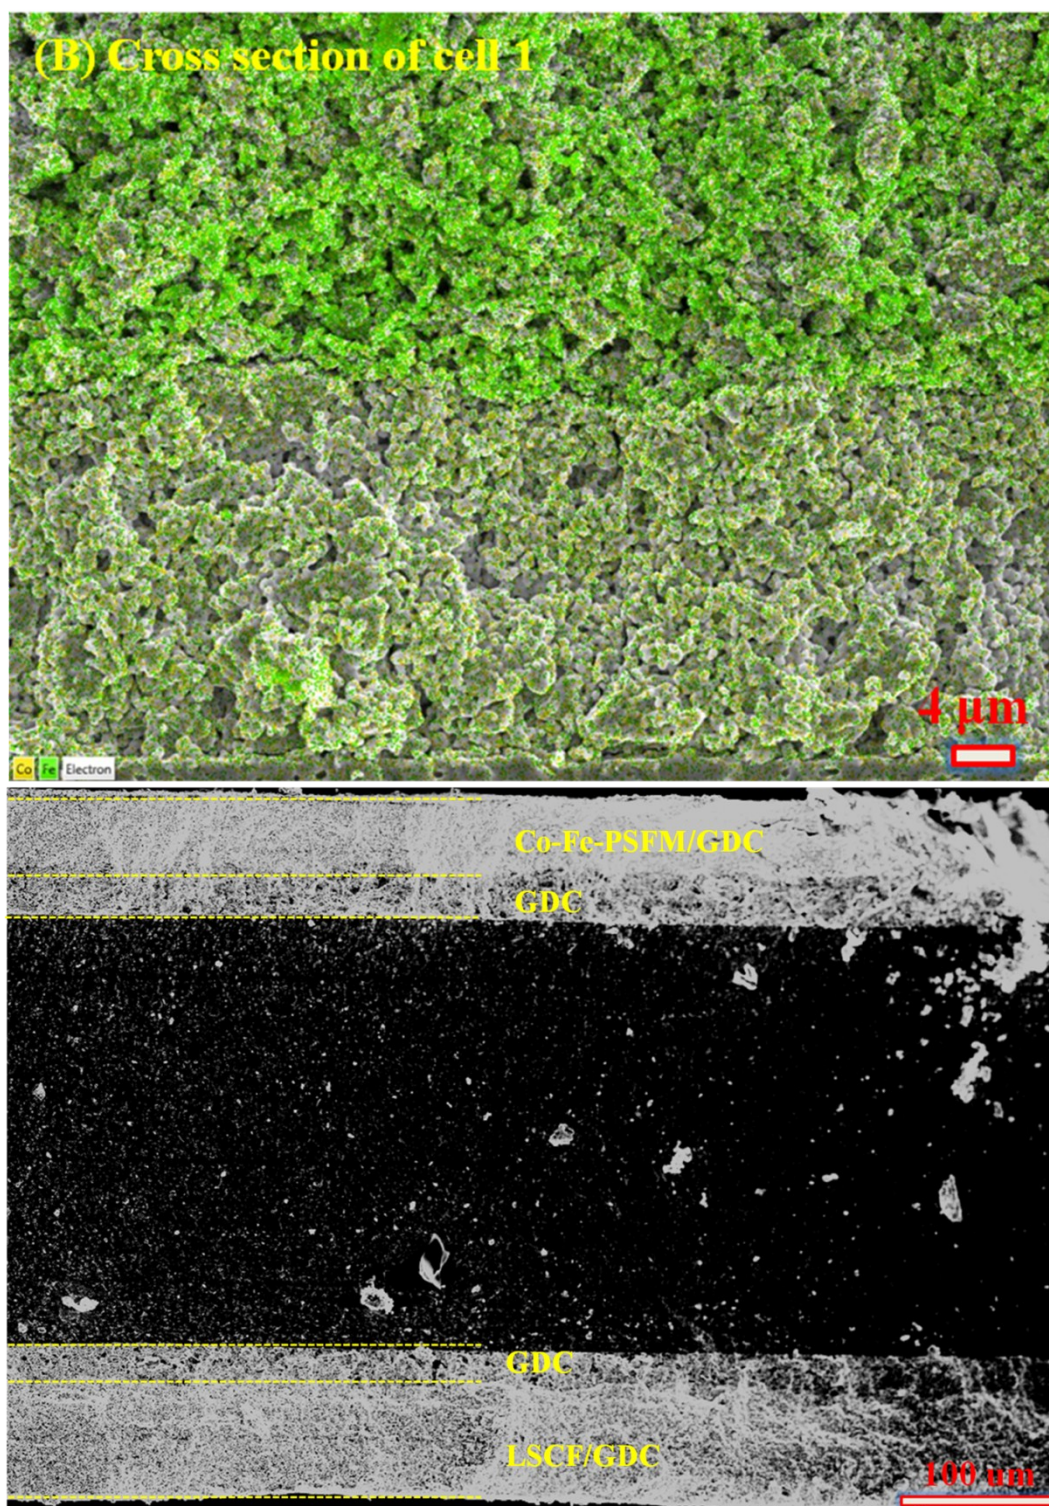

**Fig. S5.** (A) XRD pattern for the cathode surface of cell 2 with PSCFM after the stability test. (B) EDS elemental mapping of cathode side cross section of cell 2 with Co-Fe-PSFM.

## References

1. C. Duan, J. Tong, M. Shang, S. Nikodemski, M. Sanders, S. Ricote, A. Almansoori, R. O'Hayre, Science 349 (2015) 1321-1326.
2. L. Yang, Z. Liu, S. Wang, Y. Choi, C. Zuo, M. Liu, J. Power Sources 195 (2010) 471-474.
